# Supplementary material
Source: Springer Nature journal article supplement (https://www.springermedizin.de/resource/supplementary/12889_2014_6665_MOESM6_ESM.pdf/9498854)
Supplement: MOESM6 [file 9498854]

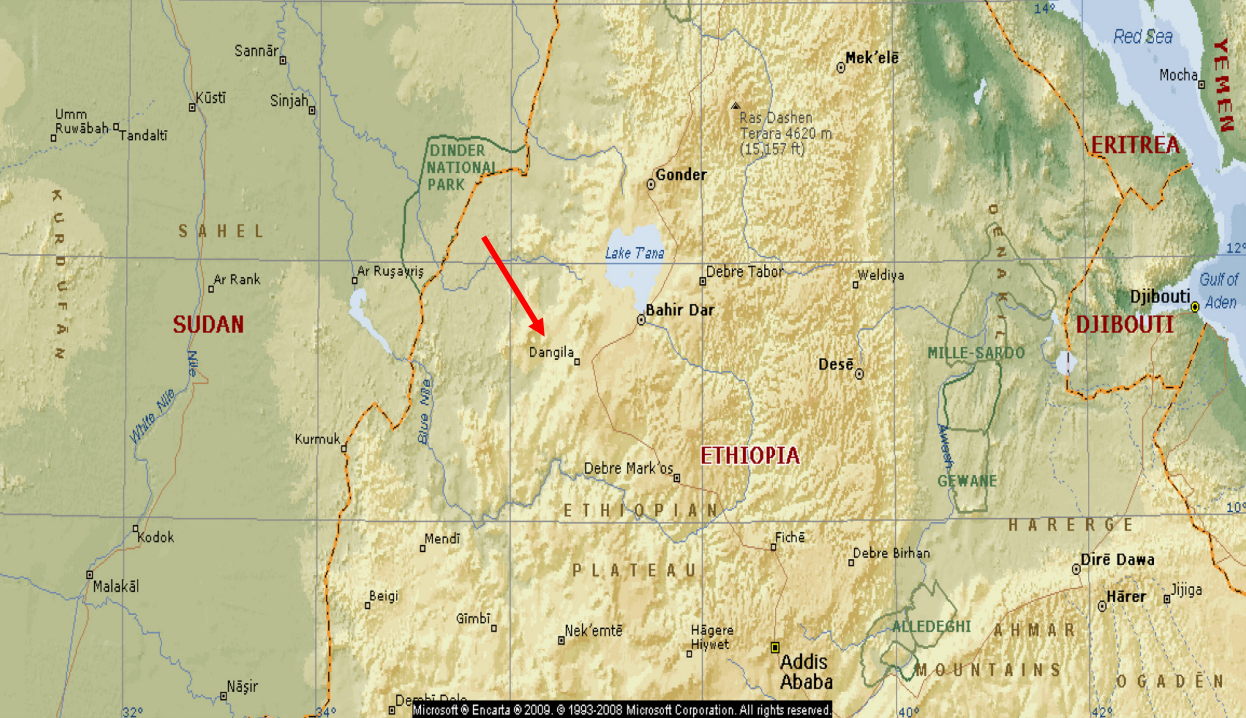

**SUDAN**

**ERITREA**

**DJIBOUTI**

**ETHIOPIA**

**DINDER NATIONAL PARK**

**MILLE-SARDO**

**GEWANE**

**ALLEDESHI MOUNTAINS**

Dangila

Mek'elē

Gondar

Bahir Dar

Desē

Fichē

Addis Ababa

Dirē Dawa

Hārer

Jijiga

Sannār

Kūsti

Sinjāh

Umm Ruwābah

Tandaltī

SAHEL

Ar Rank

Ar Ruṣayriṣ

Kurmuk

Kodok

Malakāl

Nāṣir

Dembi Dolo

Debre Mark'os

ETHIOPIAN PLATEAU

Beigi

Gimbī

Nek'emtē

Hāgere Hiywet

Debre Birhan

HARERGE

AHMAR

OGADĒN

Red Sea

YEMEN

Mocha

Gulf of Aden
